# Supplementary material for: A programmable hierarchical-responsive nanoCRISPR elicits robust activation of endogenous target to treat cancer
Source: PubMed Central journal article supplement (PMC8581410; doi:10.7150/thno.62449), 2021-10-11
Supplement: thnov11p9833s1.pdf [file thnov11p9833s1.pdf]

## Supplementary Material

### **A programmable hierarchical-responsive nanoCRISPR elicits robust activation of endogenous target to treat cancer**

*Chao Liu<sup>#</sup>, Ning Wang<sup>#</sup>, Rui Luo, Lu Li, Wen Yang, Xiye Wang, Meiling Shen,  
Qinjie Wu<sup>\*</sup>, Changyang Gong<sup>\*</sup>*

State Key Laboratory of Biotherapy and Cancer Center, West China Hospital Sichuan University, Chengdu, 610041, P. R. China

<sup>\*</sup> To whom correspondence should be addressed (C Gong and Q Wu). E-mail: [chygong14@163.com](mailto:chygong14@163.com) and [cellwqj@163.com](mailto:cellwqj@163.com).

<sup>#</sup> These authors contributed equally to this work.

**Table S1.** The sequence information of sgRNAs and primers.

| Name       | Sequence information     |
|------------|--------------------------|
| TRAIL-F    | GAGCTGAAGCAGATGCAGGAC    |
| TRAIL-R    | TGACGGAGTTGCCACTTGACT    |
| HBG1-F     | AATGTGGAAGATGCTGGAGG     |
| HBG1-R     | GCCAAAGCTGTCAAAGAACC     |
| SIM1-F     | CGCGGACTAGGAGGGAGAA      |
| SIM1-R     | GTCGTGAGTCTGATTATGGATGC  |
| DMD-F      | CAACTTATTGGCATGATGGAGTG  |
| DMD-R      | GTAGGTCACTGAAGAGGTTCTC   |
| MIAT-F     | TGGCTGGGGTTTGAACCTTT     |
| MIAT-R     | AGGAAGCTGTTCCAGACTGC     |
| FASLG-F    | AAAGGAGCTGAGGAAAGTGG     |
| FASLG-R    | CATAGGTGTCTTCCCATTCCAG   |
| LATS2-F    | AACTCACAGATTTCGGCCTC     |
| LATS2-R    | ACACCGACAGTTAGACACATC    |
| ACTB-F     | CGGGAAATCGTGCGTGACATTAAG |
| ACTB-R     | TGATCTCCTTCTGCATCCTGTCGG |
| TRAIL loci | AGAAGAGAGAAATGGGCTTG     |
| HBG1 loci  | TCCCTGAACTTTTCAAAAAT     |
| SIM1 loci  | AGACTGAAGAGCAAACGTCA     |
| DMD loci   | ACTCTACTATTGTTACACTT     |
| MIAT loci  | GCGCCCATGAAATTTTAATG     |
| FASLG loci | CATAGCCTACTAACCTGTTT     |
| LATS2 loci | CAAATAGGTCCGAGAGGCC      |



**Figure S1. The synthetic route (A),  $^1\text{H}$  NMR (B) and FTIR spectra (C) of the shell.**



**Figure S2.**  $^1\text{H}$  NMR spectra of the core.



**Figure S3.** Investigation of the expression of CD44 receptor on surface of HeLa cells by flow cytometry.



**Figure S4. Evaluation of the transfection efficiency of different compounds.**

(A) Fluorescent photographs of HeLa cells after transfected for 24 h. (B-D) Quantitative analysis by flow cytometry analysis.



Figure S5. Quantitative analysis of transfection efficiency under 0~20% FBS medium.



Figure S6. The repeated experiment of western blot.



**Figure S7. (A)** Tumor weight and **(B)** body weight of mice after different treatments.



**Figure S8.** H&E staining of main organs for toxicity analysis.
